# Supplementary material
Source: HighWire-hosted journal article supplement (https://www.highwirestage.com/highwire/filestream/93757/field_highwire_adjunct_files/0/0367.pdf)
Supplement: 0367.pdf [file 0367.pdf]

**Table 1: STRIVE definitions and proposed terminology for small vessel disease**

| <b>Proposed STRIVE term</b>        | <b>Recent small subcortical infarct</b>                                           | <b>Lacune of presumed vascular origin</b>                                                             | <b>White matter hyperintensity of presumed vascular origin</b>                      | <b>Perivascular space</b>                                                          | <b>Cerebral microbleed<sup>+</sup></b>                                              | <b>Brain atrophy</b>                                                                |
|------------------------------------|-----------------------------------------------------------------------------------|-------------------------------------------------------------------------------------------------------|-------------------------------------------------------------------------------------|------------------------------------------------------------------------------------|-------------------------------------------------------------------------------------|-------------------------------------------------------------------------------------|
| MR Image                           | 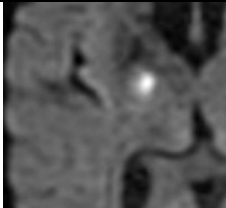 |                      |    |  |  |  |
| Size                               | ≤20 mm                                                                            | 3–15 mm                                                                                               | Variable                                                                            | ≤2 mm                                                                              | ≤10 mm                                                                              | NA                                                                                  |
| Imaging                            | Typically detected on DWI                                                         | Usually gliotic rim of T2/FLAIR hyperintensity                                                        | White matter T2/FLAIR signal hyperintensity without cavitation. Hypodensities on CT | Most linear without hyperintense rim                                               | Round or ovoid, blooming on T2*                                                     | Cortical thinning and/or sulcal enlargement                                         |
| Variable terminology in literature | 159 different terms out of 641 abstracts.                                         | more than 100 terms.                                                                                  | 50 different terms out of 940 abstracts.                                            | Synonymous terms include Virchow–Robin spaces or type 3 lacune                     | 20 out of 370 abstracts.                                                            |                                                                                     |
| Clinical Relevance                 | Cause 25% of all ischemic strokes but can be asymptomatic.                        | Common in old patients without symptoms, but increased risk of stroke, gait impairment, and dementia. | Associated with covert neurological and cognitive symptoms and gait disturbance.    | PVS in basal ganglia have increased risk of dementia.                              | Associated with SVD and Alzheimer's disease                                         |                                                                                     |

<sup>+</sup> Two other hemorrhagic manifestations of SVD include intracerebral hemorrhage and superficial cortical siderosis.
